# Supplementary material
Source: PubMed Central journal article supplement (PMC8351591)
Supplement: NIHMS1057841-supplement-1.pdf [file NIHMS1057841-supplement-1.pdf]

## **SUPPLEMENTAL MATERIAL**

### Pubmed Search Terms

#### PubMed query

“Search ("out of home"[All Fields] OR "out-of-home"[All Fields] OR "child welfare"[MeSH Terms] OR "child welfare"[All Fields] OR "children's services"[All Fields] OR "foster home care"[MeSH Terms] OR ("foster"[All Fields] AND "home"[All Fields] AND "care"[All Fields]) OR "foster home care"[All Fields] OR "fostering"[All Fields]) AND ("informed consent"[MeSH Terms] OR ("informed"[All Fields] AND "consent"[All Fields]) OR "informed consent"[All Fields]) AND ("infant"[MeSH Terms] OR "infant"[All Fields] OR "child"[MeSH Terms] OR "child"[All Fields] OR "adolescent"[MeSH Terms] OR "adolescent"[All Fields]) AND "english"[Filter)”.

**Supplemental Table 1. Included Studies and Articles for Literature Review**

| <b>Data Set</b>                 | <b>Description</b>                                                                                    | <b># Eligible</b>                                                                                                                                                                        | <b>Participants</b>                                    | <b>Consent Method</b>           | <b>Other Notes</b>                                                                                                                |  |
|---------------------------------|-------------------------------------------------------------------------------------------------------|------------------------------------------------------------------------------------------------------------------------------------------------------------------------------------------|--------------------------------------------------------|---------------------------------|-----------------------------------------------------------------------------------------------------------------------------------|--|
| POC Study (Garland et al, 2001) | Sample of youths 6 to 17 y.o from five publicly funded sectors of care in San Diego County            | 1,715 youth eligible within criteria                                                                                                                                                     | Mix of youth and caregivers                            | Caregiver consent, youth assent | Eligible if received services from any of 5 public service sectors serving youth with substance abuse issues                      |  |
| <b>Article</b>                  | <b>Article Title</b>                                                                                  | <b>Objective</b>                                                                                                                                                                         | <b># Enrolled</b>                                      | <b>Ages Included</b>            | <b>Enrollment Plan</b>                                                                                                            |  |
| Aarons, 2001                    | Prevalence of adolescent substance use disorders across five sectors of care                          | To examine the level of concordance between reports of youths enrolled in public sectors of care and their parents and identify potential predictors of parental awareness of substances | 1,036 enrolled (after missing data excluded)           | 13-18 y.o                       | Ages 6 to 17 were eligible; 12,662 (service from 5 sectors)->3,402 randomly selected-> 2,555 located->1,715 completed 1 interview |  |
| Leslie, 2003                    | Racial-ethnic differences in the use of psychotropic medication in high-risk children and adolescents | To investigate race/ethnicity and the rates of psychotropic medication use by youths                                                                                                     | 1,342 enrolled (after missing data excluded)           | 6-17 y.o                        | Ages 6 to 17 were eligible; 12,662 (service from 5 sectors)->3,417 randomly selected-> 2,626 located->1,715 completed 1 interview |  |
| Garland, 2001                   | Prevalence of psychiatric disorders in youths across five sectors of care                             | To examine prevalence of psychiatric disorders among the 5 public sectors                                                                                                                | 1,618 enrolled (patients that had DISC data available) | 6-17 y.o                        | 843 refused to consent; 12,662 (service from 5 sectors)->3,402 randomly selected-> 1,715                                          |  |

|                             |                                                                                                                                     |                                                                                                                |                                              |                                         |                                                                                                                                        |  |
|-----------------------------|-------------------------------------------------------------------------------------------------------------------------------------|----------------------------------------------------------------------------------------------------------------|----------------------------------------------|-----------------------------------------|----------------------------------------------------------------------------------------------------------------------------------------|--|
| Leslie, 2007                | Caregiver depression and medication use by youths and ADHD who receive services in the public sector                                | To examine the relationship between caregiver depression and medication use by youths                          | 390 enrolled (out of 444 eligible)           | 6-17 y.o                                | 3,417 randomly selected -> 1,715 completed 1 interview -> 444 diagnosed w/ ADHD via DISC-IV                                            |  |
| Aarons, 2008                | Association between mental and physical health problems in high-risk adolescents: A longitudinal study                              | To examine the relationship between mental and physical health problems in a sample of high-risk youth         | 1,332 enrolled (after missing data excluded) | 9-18 y.o                                | 6-17 y.o eligible; 12,662 (5 sectors) -> 3,402 randomly selected -> 1,715 completed 1 interview                                        |  |
| <b>Data Set</b>             | <b>Description</b>                                                                                                                  | <b># Eligible</b>                                                                                              | <b>Participants</b>                          | <b>Consent Method</b>                   | <b>Other Notes</b>                                                                                                                     |  |
| Great Smokey Mountain Study | A longitudinal epidemiologic study of mental health problems and service use within a predominately rural region of Southeastern US | 1,346 eligible                                                                                                 | Mixture of youth and caregivers              | Biological parent consent, youth assent | Patients considered eligible after examining scores (above predetermined threshold including 10% with lower scores)                    |  |
| <b>Article</b>              | <b>Article Title</b>                                                                                                                | <b>Objective</b>                                                                                               | <b># Enrolled</b>                            | <b>Ages Included</b>                    | <b>Enrollment Plan</b>                                                                                                                 |  |
| Farmer, 2001                | Use of mental health services by youth in contact with social services                                                              | To compare mental health service need and use between three different subsections of youth (foster care, etc.) | 1,073 enrolled                               | 9, 11, 13                               | Sample of 4,500 from public schools in 11 counties -> 4,067 found to be eligible -> 3,896 took CBCL screen -> 1,346 met score criteria |  |

| <b>Data Set</b>                                               | <b>Description</b>                                                                                                                            | <b># Eligible</b>                                                                                                      | <b>Participants</b>       | <b>Consent Method</b>                   | <b>Other Notes</b>                                                                                                    |  |
|---------------------------------------------------------------|-----------------------------------------------------------------------------------------------------------------------------------------------|------------------------------------------------------------------------------------------------------------------------|---------------------------|-----------------------------------------|-----------------------------------------------------------------------------------------------------------------------|--|
| LONGSCAN                                                      | A coordinated set of 5 prospective studies of the causes, correlates, and consequences of child abuse and neglect                             | Not Reported                                                                                                           | Maternal CG's interviewed | Biological parent consent, youth assent |                                                                                                                       |  |
| <b>Article</b>                                                | <b>Article Title</b>                                                                                                                          | <b>Objective</b>                                                                                                       | <b># Enrolled</b>         | <b>Ages Included</b>                    | <b>Enrollment Plan</b>                                                                                                |  |
| Runyan, 1998                                                  | Children who prosper in unfavorable environment: the relationship to social capital                                                           | To examine the relationship between social capital and developmental and behavioral outcomes in high-risk preschoolers | 667                       | 2-5                                     | Cross-sectional analysis of participants in North Carolina (141), San Diego (146), Baltimore (196), and Seattle (184) |  |
| <b>Data Set</b>                                               | <b>Description</b>                                                                                                                            | <b># Eligible</b>                                                                                                      | <b>Participants</b>       | <b>Consent Method</b>                   | <b>Other Notes</b>                                                                                                    |  |
| National Longitudinal Study of Adolescent Health (Add Health) | Large, nationally representative sample of youth with waves of data across 80 US high schools and 52 US middle schools collected over 6 years | 15,197                                                                                                                 | Varied                    | Biological parent consent, youth assent | Articles 13 and 15 involved CG participation; Article 14 only included youth                                          |  |
| <b>Article</b>                                                | <b>Article Title</b>                                                                                                                          | <b>Objective</b>                                                                                                       | <b># Enrolled</b>         | <b>Ages Included</b>                    | <b>Enrollment Plan</b>                                                                                                |  |

|                                                           |                                                                                                                   |                                                                                          |                                 |                                  |                                                                                                                        |  |
|-----------------------------------------------------------|-------------------------------------------------------------------------------------------------------------------|------------------------------------------------------------------------------------------|---------------------------------|----------------------------------|------------------------------------------------------------------------------------------------------------------------|--|
| Ahrens, 2010                                              | Naturally acquired mentoring relationships and young adult outcomes among adolescents with learning disabilities  | Does naturally acquired mentor during adolescence was related to improved adult outcomes | 1,714                           | 7th - 12th grade                 | 90,118 had interview - > 20,745 had another 1 yr after -> 15,197 interviewed 2-6 years after first                     |  |
| Ahrens, 2008                                              | Youth in foster care with adult mentors during adolescence have improved adult outcomes                           | Do foster youth w/ natural mentors have better adult outcomes                            | 310 youth only                  | 14 - 18                          | 90,118 had interview - > 20,745 had another 1 yr after -> 15,197 interviewed 2-6 years after first                     |  |
| Ahrens, 2010                                              | Laboratory-diagnosed sexually transmitted infections in former foster youth compared with peers                   | To study the relationship between residing foster care and STI risk                      | 14,322                          | 7th - 12th grade                 | 90,118 had interview - > 20,745 had another 1 yr after -> 15,197 interviewed 2-6 years after first                     |  |
| <b>Data Set</b>                                           | <b>Description</b>                                                                                                | <b># Eligible</b>                                                                        | <b>Participants</b>             | <b>Consent Method</b>            | <b>Other Notes</b>                                                                                                     |  |
| National Study of Child and Adolescent Well-Being (NSCAW) | A longitudinal study examining the characteristics, needs, and outcomes of children for alleged abuse and neglect | Variable                                                                                 | Mixture of youth and caregivers | Caseworker consent, youth assent | Most studies dealt with youth who had contact with the foster care system in a 15 mo. time period beginning in Oct '99 |  |
| <b>Article</b>                                            | <b>Article Title</b>                                                                                              | <b>Objective</b>                                                                         | <b># Enrolled</b>               | <b>Ages Included</b>             | <b>Enrollment Plan</b>                                                                                                 |  |

|              |                                                                                                           |                                                                                            |                    |         |                                                                                                                                                                                                                      |  |
|--------------|-----------------------------------------------------------------------------------------------------------|--------------------------------------------------------------------------------------------|--------------------|---------|----------------------------------------------------------------------------------------------------------------------------------------------------------------------------------------------------------------------|--|
| Leslie, 2010 | Health-risk behaviors in young adolescents in the child welfare system                                    | To examine rates and patterns of health-risk behavior among national of active foster care | 993 (out of 5501)  | 11 - 15 | Spanning 96 counties across 36 states, children were randomly selected from a pop of children between 0-15 years, then those below 11 and above 15 were excluded                                                     |  |
| Leslie, 2004 | Outpatient mental health services for children in foster care: A national perspective                     | Examining what factors influencing the use of outpatient mental health                     | 462 (out of 1,291) | 2 - 15  | Cohort included children 0-14 y.o specifically those in out-of-home placement for 1 year                                                                                                                             |  |
| Traube, 2012 | A national study of risk and protective factors for substance use among youth in the child welfare system | Examining the association between baseline psychosocial risk and protective factors        | 827 (out of 5,501) | 11 - 14 | Data were collected between '99 to '02 resulting in 5,501 eligible children -> 1,180 were between 11 and 14 -> 1,030 were interviewed at waves 1, 3, and 4 of original study -> 827 had substance use data available |  |

|                |                                                                                                                  |                                                                                                              |                                 |        |                                                                                                                                                                                                                                            |  |
|----------------|------------------------------------------------------------------------------------------------------------------|--------------------------------------------------------------------------------------------------------------|---------------------------------|--------|--------------------------------------------------------------------------------------------------------------------------------------------------------------------------------------------------------------------------------------------|--|
| Burns, 2004    | Mental health need and access to mental health services by youths involved with child welfare: A national survey | Study of the relationship between need for and use of mental health services among foster youth              | 3803 (out of 5,504)             | 2 - 14 | 5,504 eligible from randomly selected cohort -> ages 2-14 included resulting in 3,803 participants                                                                                                                                         |  |
| Stahmer, 2005  | Developmental and behavioral needs and service use for young children in child welfare                           | Examining the level of developmental and behavioral need for youth in foster care - early intervention       | 2813 (out of 5,504)             | <6     | 5,504 eligible children with active child welfare case, families whose cases were not substantiated, and those that were substantiated but did not have active child welfare case -> children <6 were included resulting in 2,813 children |  |
| Raghavan, 2005 | Psychotropic medication use in a national probability sample of children in the child welfare system             | To examine the psychotropic need, used, and relationships between child level characteristics, provider type | 3,114 (# eligible not reported) | 2 - 14 | Sampling was done in same 15 month sampling time frame, but excluded children in foster care for 1 year at time of sampling as well as children below 2                                                                                    |  |

|                                                                 |                                                                                                                             |                                                                                                  |                                 |                                  |                                                                                                                                      |  |
|-----------------------------------------------------------------|-----------------------------------------------------------------------------------------------------------------------------|--------------------------------------------------------------------------------------------------|---------------------------------|----------------------------------|--------------------------------------------------------------------------------------------------------------------------------------|--|
| Leslie, 2010                                                    | Rates of psychotropic medication use over time among youth in child welfare/child protective services                       | Examining use of psychotropic medication over time among foster youth                            | 2,521 (out of 5,501)            | 2 - 16                           | Sampling done in 15 month time frame similar to above, but age seemed to be only exclusion factor                                    |  |
| Leslie, 2011                                                    | Investigating geographic variation in use of psychotropic medications among youth in child welfare                          | Geographic domain and psychotropic med use among child welfare                                   | 2504 (# eligible not reported)  | 2 - 15                           | Sampling similar to above article                                                                                                    |  |
| <b>Data Set</b>                                                 | <b>Description</b>                                                                                                          | <b># Eligible</b>                                                                                | <b>Participants</b>             | <b>Consent Method</b>            | <b>Other Notes</b>                                                                                                                   |  |
| National Study of Child and Adolescent Well-Being II (NSCAW II) | Includes a cohort of children who had contact with the child welfare system within a 15 month period that began in Feb 2008 | 5,872                                                                                            | Mixture of youth and caregivers | Caseworker consent, youth assent |                                                                                                                                      |  |
| <b>Article</b>                                                  | <b>Article Title</b>                                                                                                        | <b>Objective</b>                                                                                 | <b># Enrolled</b>               | <b>Ages Included</b>             | <b>Enrollment Plan</b>                                                                                                               |  |
| Stein, 2014                                                     | Health status and type of out-of-home placement: Informal kinship care in an investigated sample                            | To assess sociodemographic health and mental health of children in out-of-home living situations | 1,608                           | 0-17.5                           | Only children who began living in foster care or formal or informal kinship care after the child welfare investigation were examined |  |



| <b>Data Set</b>    | <b>Description</b>                                                                                          | <b># Eligible</b>                                                                              | <b>Participants</b>             | <b>Consent Method</b>            | <b>Other Notes</b>                                                                                                   |  |
|--------------------|-------------------------------------------------------------------------------------------------------------|------------------------------------------------------------------------------------------------|---------------------------------|----------------------------------|----------------------------------------------------------------------------------------------------------------------|--|
| NSCAW & Add Health | Same description as above                                                                                   | Not Reported                                                                                   | Mixture of youth and caregivers | Caseworker consent, youth assent |                                                                                                                      |  |
| <b>Article</b>     | <b>Article Title</b>                                                                                        | <b>Objective</b>                                                                               | <b># Enrolled</b>               | <b>Ages Included</b>             | <b>Enrollment Plan</b>                                                                                               |  |
| Fettes, 2013       | Higher rates of adolescent substance use in child welfare versus community populations in the United States | Comparing psychosocial factors to lifetime and current substance abuse rates among foster care | 4,445 Add Health; 730 NSCAW     | 12 - 14                          | Ages 12-14 at time of first interview, whose caregiver also participated, and for whom sample weights were available |  |
| Fettes, 2011       | Smoking behavior of US youths: A comparison between child welfare system and community populations          | Investigated factors associated with smoking for each group                                    | 4,472 Add Health; 740 NSCAW     | 12 - 14                          | Same as above                                                                                                        |  |
| <b>Data Set</b>    | <b>Description</b>                                                                                          | <b># Eligible</b>                                                                              | <b>Participants</b>             | <b>Consent Method</b>            | <b>Other Notes</b>                                                                                                   |  |

|                                                          |                                                                                                                                                                        |                                                                                              |                     |                                                      |                                                                                                                                                                 |  |
|----------------------------------------------------------|------------------------------------------------------------------------------------------------------------------------------------------------------------------------|----------------------------------------------------------------------------------------------|---------------------|------------------------------------------------------|-----------------------------------------------------------------------------------------------------------------------------------------------------------------|--|
| LA County Department of Child and Family Services (DCFS) | Management Information System of children aged 6 through 12 living in out-of-home placements from three of the eight county service areas between July 96 and March 98 | 2,103                                                                                        | Youth               | Caseworker, GAL, and caregiver consent, youth assent |                                                                                                                                                                 |  |
| <b>Article</b>                                           | <b>Article Title</b>                                                                                                                                                   | <b>Objective</b>                                                                             | <b># Enrolled</b>   | <b>Ages Included</b>                                 | <b>Enrollment Plan</b>                                                                                                                                          |  |
| Zima, 1999                                               | Psychotropic medication treatment patterns among school-aged children in foster care                                                                                   | To examine levels of psychotropic medication use and patterns of treatment among foster care | 302                 | 6 - 12                                               | 2,103 children during the 21 mo study period -> 472 randomly selected -> 330 verified eligible by caseworker -> 302 of which completed the first home interview |  |
| <b>Data Set</b>                                          | <b>Description</b>                                                                                                                                                     | <b># Eligible</b>                                                                            | <b>Participants</b> | <b>Consent Method</b>                                | <b>Other Notes</b>                                                                                                                                              |  |

|                             |                                                                                                                                                                                         |                                                                                                |                                 |                                                          |                                                                                                                                                                                             |  |
|-----------------------------|-----------------------------------------------------------------------------------------------------------------------------------------------------------------------------------------|------------------------------------------------------------------------------------------------|---------------------------------|----------------------------------------------------------|---------------------------------------------------------------------------------------------------------------------------------------------------------------------------------------------|--|
| San Diego County Admin Data | Large cohort of children and adolescents (ages 0-17) who had entered out-of-home care due to maltreatment between May 90 and October 91 and remained in placement for at least 5 months | 1, 221                                                                                         | Mixture of youth and caregivers | judge and caseworker and caregiver consent, youth assent |                                                                                                                                                                                             |  |
| <b>Article</b>              | <b>Article Title</b>                                                                                                                                                                    | <b>Objective</b>                                                                               | <b># Enrolled</b>               | <b>Ages Included</b>                                     | <b>Enrollment Plan</b>                                                                                                                                                                      |  |
| Litrownik, 2005             | Assessment of depressive symptomatology in young maltreated children                                                                                                                    | To explore depression in young maltreated children                                             | 197                             | 3-7                                                      | 354 eligible 3-7 yr olds -> 197 completed PRESS (157 either couldn't be located or refused to participate)                                                                                  |  |
| Leslie, 2000                | Children in foster care: Factors influencing outpatient mental health service use                                                                                                       | To determine factors affecting outpatient mental health service use by children in foster care | 480 (out of 1,078)              | 4-17                                                     | Inclusion criteria included (1) remained in out-of-home care at 4 months after entry into foster system, (2) were placed in SD County, (3) had Department of Social Services data available |  |

|                                                                                           |                                                                                                                         |                                                                             |                     |                       |                                                                                                                                                                                                                                                                                                  |  |
|-------------------------------------------------------------------------------------------|-------------------------------------------------------------------------------------------------------------------------|-----------------------------------------------------------------------------|---------------------|-----------------------|--------------------------------------------------------------------------------------------------------------------------------------------------------------------------------------------------------------------------------------------------------------------------------------------------|--|
| Newton, 2000                                                                              | Children and youth in foster care:<br>Disentangling the relationship between problem behaviors and number of placements | To look at relationships between COP and problem behaviors over 1 yr period | 415                 | 2-17                  | 1,221 eligible children from larger cohort -> 934 had data obtained -> 702 after <2 years were excluded -> 465 met interview timing criteria (no less than 6 mos no more than 18 mos between interviews) -> 40 excluded due to incomplete CBCL data -> 10 excluded due to lack of placement data |  |
| <b>Data Set</b>                                                                           | <b>Description</b>                                                                                                      | <b># Eligible</b>                                                           | <b>Participants</b> | <b>Consent Method</b> | <b>Other Notes</b>                                                                                                                                                                                                                                                                               |  |
| Lucas County Children's Services Independent Living Program and Post-emancipation Program | Comprehensive list of current and emancipated youth in either ILP or PEP programs within Lucas County                   | Not Reported                                                                | Youth               | Child consent only    | Admin data reviewed included 72 current FY enrolled in ILP on 1/1/08, 108 ILP youth who emancipated from care from 1/1/05 to 12/31/07, and 43 emancipated youth who received PEP services from 1/1/06 to 12/31/07                                                                                |  |
| <b>Article</b>                                                                            | <b>Article Title</b>                                                                                                    | <b>Objective</b>                                                            | <b># Enrolled</b>   | <b>Ages Included</b>  | <b>Enrollment Plan</b>                                                                                                                                                                                                                                                                           |  |

| Mares, 2008                    | Needs assessment of emancipating foster youth in Lucas County, Ohio final report | To help inform future service-oriented requests for proposals to aid emancipating youths                                                                                                 | 31                | 16+               | Focused groups consisted of ILP youth in foster homes, ILP youth placed in treatment homes, 8 PEP young adults, and 5 emancipated youth who didn't receive PEP services |                                                               |
|--------------------------------|----------------------------------------------------------------------------------|------------------------------------------------------------------------------------------------------------------------------------------------------------------------------------------|-------------------|-------------------|-------------------------------------------------------------------------------------------------------------------------------------------------------------------------|---------------------------------------------------------------|
| <b>Non-Admin Data Articles</b> |                                                                                  |                                                                                                                                                                                          |                   |                   |                                                                                                                                                                         |                                                               |
| <b>Article</b>                 | <b>Ages Included</b>                                                             | <b>Objective</b>                                                                                                                                                                         | <b># Eligible</b> | <b># Enrolled</b> | <b>Consent Method</b>                                                                                                                                                   | <b>Enrollment Plan</b>                                        |
| Green, 2011                    | 11-18                                                                            | To examine the level of concordance between reports of youths enrolled in public sectors of care and their parents and identify potential predictors of parental awareness of substances | 1,418             | 985               | Caregiver consent, youth assent                                                                                                                                         | Participants drawn from a representative group                |
| Garland, 2000                  | 13-18                                                                            | To develop a multidimensional scale of adolescents' satisfaction w/ mental health services w/ items derived from interviews                                                              | 584               | 180               | Caregiver consent, youth assent                                                                                                                                         | 584 eligible based on criteria and then 225 randomly selected |

|               |       |                                                                                                                      |              |                          |                                                        |                                                                                                                          |
|---------------|-------|----------------------------------------------------------------------------------------------------------------------|--------------|--------------------------|--------------------------------------------------------|--------------------------------------------------------------------------------------------------------------------------|
| Price, 1998   | 5-10  | Determine if social information processing patterns were predictive of later social adaptation and behavior problems | Not Reported | 124                      | Caregiver consent, youth assent                        | 0-18 y.o eligible; maltreated children; siblings were randomly selected                                                  |
| Gardner, 1996 | 8-15  | Perceptions of children in family foster care                                                                        | Not Reported | 43 (42 matched controls) | Caregiver consent, youth assent                        | Five foster care agencies in Melbourne area selected 51 children between 8 and 15 who have been in care more than 1 year |
| Taussig, 2001 | 7-12  | Behavioral outcomes for youth who were reunified after placement in foster care in comparison to non-reunified       | 287          | 214                      | Biological parent consent, youth assent                | 324, but 37 didn't meet criteria; Between May 1990 to Oct. 1991; 3 criteria types                                        |
| Johnson, 1995 | 11-14 | What is the impact of foster care (from child's perspective)                                                         | 95           | 59                       | Biological parent and caseworker consent, child assent | 95 randomly selected; 8 refused to consent; BP (3); Child (4); FP (1)                                                    |
| Taussig, 2002 | 7-12  | Examining protective and vulnerability factors in youth in foster care                                               | 287          | 214                      | Biological parent and caseworker consent, child assent | 324 from sample                                                                                                          |
| Poulton, 2014 | 13-17 | Do comprehensive psychosocial interventions alter psychotic symptom trajectories                                     | Not Reported | 166                      | Caseworker consent, youth assent                       |                                                                                                                          |

|                 |       |                                                                                                      |     |     |                                          |                                                                                        |
|-----------------|-------|------------------------------------------------------------------------------------------------------|-----|-----|------------------------------------------|----------------------------------------------------------------------------------------|
| Narendorf, 2012 | 16-18 | Explore perspectives of older youths in the midst from residential to treatment foster home programs | 46  | 8   | Caseworker consent, youth assent         | Possibly 7? One decided not to participate before foster home                          |
| McMillen, 2015  | 16-18 | Piloting program to aid in step down situations from residential to treatment                        | 46  | 14  | Caseworker consent, youth assent         | Foster parents also consented according to methods                                     |
| Tanaka, 2011    | 16-20 | Examined the relationship between child maltreatment and self-compassion                             | 561 | 117 | Caseworker consent, youth assent         | Maltreatment and Adolescent Pathways (MAP); Long. Study; 2002 - 2010; most aged 14 -17 |
| Courtney, 2001  | 17-18 | Examining how youths fare during/after transition to independence                                    | 149 | 141 | Caseworker consent, youth assent         | Foster Youth Transitions to Adulthood Study; Feb - May '95                             |
| Raghavan, 2009  | 17    | Youth in foster care who lose Medicaid and then can secure other insurance                           | 450 | 404 | Caseworker consent, youth assent         | Dec '01 - May '03; 450 randomly selected with complete data                            |
| Weisz, 2011     | 8-18  | Determining pros and cons of court as well with judicial behavior and age differences                | 150 | 93  | Caseworker and GAL consent, youth assent |                                                                                        |

|                   |                |                                                                                           |              |                 |                                                              |                                                                           |
|-------------------|----------------|-------------------------------------------------------------------------------------------|--------------|-----------------|--------------------------------------------------------------|---------------------------------------------------------------------------|
| Hobbs, 2014       | 7-10           | Investigated attitudes of maltreated children involved in court hearings                  | 218          | 137             | Judge consent, youth assent                                  | 85 dependency; 52 criminal; 4-16 y.o; 218 criminal -> 52 selected         |
| Block, 2010       | 7-10           | Maltreated children knowledge and attitudes about their court experiences                 | Not Reported | 85              | Judge consent, youth assent                                  | 50-100 waiting for cases to be heard; dependency courts                   |
| Wandrey, 2012     | 6-10           | Examining maltreated foster youth's temporal knowledge                                    | Not Reported | 167             | Judge and caseworker consent, child assent                   | LA County dependency court                                                |
| Aarons, 2010      | 11-17          | Examining the degree to which youths and caregivers attend to different factors -> mental | 306 families | 526 individuals | Judge or caseworker consent, caregiver consent, youth assent | 306 families --> 284 families                                             |
| Chamberlain, 2006 | 5-12           | To identify predictors of foster placement disruption to assess risk of failure           | Not Reported | 246             | Caregiver consent only                                       | Children were part of larger study allowing to be eligible for this study |
| Chamberlain, 2008 | 5-12           | Effectiveness of parent management training on foster children                            | Not Reported | 700             | Caregiver consent only                                       |                                                                           |
| Kirk, 2012        | 6th-12th grade | The effect of gender on educational expectations and measures gender differences          | Not Reported | 550             | Biological parent consent only                               | Enrolled from Kansas Kids Program                                         |



|                 |              |                                                                         |              |     |                              |                                                                                                        |
|-----------------|--------------|-------------------------------------------------------------------------|--------------|-----|------------------------------|--------------------------------------------------------------------------------------------------------|
| Keller, 2010    | 17+          | Older foster youth probability of alcohol abuse or dependence           | 880          | 732 | Child consent only           | Apr to Jun 2012; 67% eligible across 3 states -> 880 identified -> 732 of 770 remaining were consented |
| Van Ryzin, 2011 | Not Reported | To help youth to improve their ability to negotiate and cope w/ changes | Not Reported | 569 | Waiver of consent and assent | Youth Experiences of Transitions                                                                       |
